# Supplementary material for: A family of acetato-diphenoxo triply bridged dimetallic ZnIILnIIIcomplexes: SMM behavior and luminescent properties
Source: Royal Society of Chemistry journal article supplement (doi:10.1039/c6dt01327a), 2016-01-01
Supplement: c6dt01327a1.pdf [file c6dt01327a1.pdf]

## SUPPORTING INFORMATION

A family of carboxylate-diphenoxo triply  
bridged dimetallic  $Zn^{II}Ln^{III}$  complexes: SMM  
behavior and luminescent properties

*Itziar Oyarzabal, Beñat Artetxe, Antonio Rodríguez-Diéguez, José Ángel García, José Manuel Seco and Enrique Colacio*

### **Index:**

- 1. Elemental Analyses and Crystallographic Tables.**
- 2. Experimental XRPD.**
- 3. Continuous Shape Measurements.**
- 4. Magnetic Measurements.**
- 5. Reflectance Spectra.**
- 6. Luminescence Properties.**

## 1. Elemental Analyses and Crystallographic Tables.

Table S1.- Yields and elemental analyses for complexes 1-11

| Complex | Yield (%) | Formula                                                                             | % C<br>calc./found | % H<br>calc./found | % N<br>calc./found |
|---------|-----------|-------------------------------------------------------------------------------------|--------------------|--------------------|--------------------|
| 1       | 69        | C <sub>24</sub> H <sub>26</sub> N <sub>5</sub> O <sub>12</sub> Br <sub>2</sub> ZnPr | 30.58/30.64        | 2.78/2.81          | 7.43/7.47          |
| 2       | 71        | C <sub>24</sub> H <sub>26</sub> N <sub>5</sub> O <sub>12</sub> Br <sub>2</sub> ZnNd | 30.47/30.52        | 2.77/2.79          | 7.40/7.42          |
| 3       | 65        | C <sub>24</sub> H <sub>26</sub> N <sub>5</sub> O <sub>12</sub> Br <sub>2</sub> ZnSm | 30.28/30.35        | 2.75/2.76          | 7.36/7.39          |
| 4       | 60        | C <sub>24</sub> H <sub>26</sub> N <sub>5</sub> O <sub>12</sub> Br <sub>2</sub> ZnEu | 30.23/30.25        | 2.75/2.78          | 7.34/7.38          |
| 5       | 63        | C <sub>24</sub> H <sub>26</sub> N <sub>5</sub> O <sub>12</sub> Br <sub>2</sub> ZnGd | 30.06/30.13        | 2.73/2.75          | 7.30/7.35          |
| 6       | 62        | C <sub>24</sub> H <sub>26</sub> N <sub>5</sub> O <sub>12</sub> Br <sub>2</sub> ZnTb | 30.01/30.09        | 2.73/2.75          | 7.29/7.34          |
| 7       | 68        | C <sub>24</sub> H <sub>26</sub> N <sub>5</sub> O <sub>12</sub> Br <sub>2</sub> ZnDy | 29.90/29.94        | 2.72/2.76          | 7.26/7.30          |
| 8       | 61        | C <sub>24</sub> H <sub>26</sub> N <sub>5</sub> O <sub>12</sub> Br <sub>2</sub> ZnHo | 29.82/29.88        | 2.71/2.73          | 7.24/7.28          |
| 9       | 70        | C <sub>24</sub> H <sub>26</sub> N <sub>5</sub> O <sub>12</sub> Br <sub>2</sub> ZnEr | 29.75/29.83        | 2.71/2.75          | 7.23/7.30          |
| 10      | 58        | C <sub>24</sub> H <sub>26</sub> N <sub>5</sub> O <sub>12</sub> Br <sub>2</sub> ZnTm | 29.70/29.72        | 2.70/2.71          | 7.22/7.25          |
| 11      | 63        | C <sub>24</sub> H <sub>26</sub> N <sub>5</sub> O <sub>12</sub> Br <sub>2</sub> ZnYb | 29.57/29.61        | 2.69/2.70          | 7.18/7.21          |

**Table S2.-** Crystallographic data for compounds **1**, **2** and **4-6**.

| <b>Compound</b>                                          | <b>1</b>                                                                            | <b>2</b>                                                                            | <b>4</b>                                                                            | <b>5</b>                                                                            | <b>6</b>                                                                            |
|----------------------------------------------------------|-------------------------------------------------------------------------------------|-------------------------------------------------------------------------------------|-------------------------------------------------------------------------------------|-------------------------------------------------------------------------------------|-------------------------------------------------------------------------------------|
| Formula                                                  | C <sub>24</sub> H <sub>26</sub> N <sub>5</sub> O <sub>12</sub> Br <sub>2</sub> ZnPr | C <sub>24</sub> H <sub>26</sub> N <sub>5</sub> O <sub>12</sub> Br <sub>2</sub> ZnNd | C <sub>24</sub> H <sub>26</sub> N <sub>5</sub> O <sub>12</sub> Br <sub>2</sub> ZnEu | C <sub>24</sub> H <sub>26</sub> N <sub>5</sub> O <sub>12</sub> Br <sub>2</sub> ZnGd | C <sub>24</sub> H <sub>26</sub> N <sub>5</sub> O <sub>12</sub> Br <sub>2</sub> ZnTb |
| <i>M<sub>r</sub></i>                                     | 942.60                                                                              | 945.93                                                                              | 953.65                                                                              | 958.94                                                                              | 960.61                                                                              |
| Crystal system                                           | Monoclinic                                                                          | Monoclinic                                                                          | Monoclinic                                                                          | Monoclinic                                                                          | Monoclinic                                                                          |
| Space group (no.)                                        | <i>P21/n</i> (14)                                                                   |
| <i>a</i> (Å)                                             | 13.45653(19)                                                                        | 13.4135(2)                                                                          | 13.5257(2)                                                                          | 13.4496(5)                                                                          | 13.5017(6)                                                                          |
| <i>b</i> (Å)                                             | 14.75424(18)                                                                        | 14.7713(2)                                                                          | 14.9372(2)                                                                          | 14.7776(5)                                                                          | 14.7618(4)                                                                          |
| <i>c</i> (Å)                                             | 16.2850(3)                                                                          | 16.1930(2)                                                                          | 15.8049(2)                                                                          | 16.0073(6)                                                                          | 15.9579(6)                                                                          |
| $\alpha$ (°)                                             | 90                                                                                  | 90                                                                                  | 90                                                                                  | 90                                                                                  | 90                                                                                  |
| $\beta$ (°)                                              | 91.4469(14)                                                                         | 91.2300(10)                                                                         | 90.109(2)                                                                           | 91.051(3)                                                                           | 91.315(4)                                                                           |
| $\gamma$ (°)                                             | 90                                                                                  | 90                                                                                  | 90                                                                                  | 90                                                                                  | 90                                                                                  |
| <i>V</i> (Å <sup>3</sup> )                               | 3232.21(8)                                                                          | 3207.66(8)                                                                          | 3193.15(8)                                                                          | 3181.0(2)                                                                           | 3179.7(2)                                                                           |
| <i>Z</i>                                                 | 4                                                                                   | 4                                                                                   | 4                                                                                   | 4                                                                                   | 4                                                                                   |
| <i>D<sub>c</sub></i> (g cm <sup>-3</sup> )               | 1.937                                                                               | 1.959                                                                               | 1.984                                                                               | 2.002                                                                               | 2.007                                                                               |
| $\mu$ (MoK $\alpha$ ) (mm <sup>-1</sup> ) <sup>d</sup>   | 4.770                                                                               | 4.906                                                                               | 18.361                                                                              | 5.400                                                                               | 5.540                                                                               |
| <i>T</i> (K)                                             | 100(2)                                                                              | 100(2)                                                                              | 100(2)                                                                              | 100(2)                                                                              | 100(2)                                                                              |
| Observed reflections                                     | 6350 (5141)                                                                         | 5633 (4984)                                                                         | 6406 (6158)                                                                         | 5574 (4651)                                                                         | 6584 (5277)                                                                         |
| <i>R<sub>int</sub></i>                                   | 0.0306                                                                              | 0.0293                                                                              | 0.0308                                                                              | 0.0392                                                                              | 0.0462                                                                              |
| Parameters                                               | 410                                                                                 | 410                                                                                 | 409                                                                                 | 410                                                                                 | 410                                                                                 |
| GOF                                                      | 1.013                                                                               | 1.126                                                                               | 1.036                                                                               | 1.076                                                                               | 1.064                                                                               |
| <i>R<sub>T</sub></i> <sup>a,b</sup>                      | 0.0484 (0.0343)                                                                     | 0.0301 (0.0248)                                                                     | 0.0302 (0.0288)                                                                     | 0.0492 (0.0375)                                                                     | 0.0529 (0.0368)                                                                     |
| <i>wR<sub>2</sub></i> <sup>c</sup>                       | 0.0697 (0.0642)                                                                     | 0.0680 (0.0654)                                                                     | 0.0818 (0.0805)                                                                     | 0.0989 (0.0930)                                                                     | 0.0875 (0.0807)                                                                     |
| Largest difference in peak and hole (e Å <sup>-3</sup> ) | 1.180 and -0.724                                                                    | 2.035 and -0.478                                                                    | 2.441 and -0.874                                                                    | 2.148 and -1.013                                                                    | 1.903 and -0.888                                                                    |

<sup>a</sup>  $R_1 = \sum |F_o| - |F_c| / \sum |F_o|$ . <sup>b</sup> Values in parentheses for reflections with  $I > 2\sigma(I)$ . <sup>c</sup>  $wR_2 = \{\sum [w(F_o^2 - F_c^2)^2] / \sum [w(F_o^2)^2]\}^{1/2}$  <sup>d</sup>  $\mu$ (CuK $\alpha$ ) (mm<sup>-1</sup>) in **4**

**Table S3.-** Crystallographic data for compounds **7** and **9-11**.

| <b>Compound</b>                                          | <b>7</b>                                                                            | <b>9</b>                                                                            | <b>10</b>                                                                           | <b>11</b>                                                                           |
|----------------------------------------------------------|-------------------------------------------------------------------------------------|-------------------------------------------------------------------------------------|-------------------------------------------------------------------------------------|-------------------------------------------------------------------------------------|
| Formula                                                  | C <sub>24</sub> H <sub>26</sub> N <sub>5</sub> O <sub>12</sub> Br <sub>2</sub> ZnDy | C <sub>24</sub> H <sub>26</sub> N <sub>5</sub> O <sub>12</sub> Br <sub>2</sub> ZnEr | C <sub>24</sub> H <sub>26</sub> N <sub>5</sub> O <sub>12</sub> Br <sub>2</sub> ZnTm | C <sub>24</sub> H <sub>26</sub> N <sub>5</sub> O <sub>12</sub> Br <sub>2</sub> ZnYb |
| <i>M<sub>r</sub></i>                                     | 964.19                                                                              | 968.95                                                                              | 970.62                                                                              | 974.73                                                                              |
| Crystal system                                           | Monoclinic                                                                          | Monoclinic                                                                          | Monoclinic                                                                          | Monoclinic                                                                          |
| Space group (no.)                                        | <i>P21/n</i> (14)                                                                   | <i>P21/n</i> (14)                                                                   | <i>P21/n</i> (14)                                                                   | <i>P21/n</i> (14)                                                                   |
| <i>a</i> (Å)                                             | 13.5589(12)                                                                         | 13.5236(2)                                                                          | 13.5836(6)                                                                          | 13.5447(10)                                                                         |
| <i>b</i> (Å)                                             | 14.8592(11)                                                                         | 14.7278(17)                                                                         | 14.8415(5)                                                                          | 14.8034(12)                                                                         |
| <i>c</i> (Å)                                             | 15.8350(12)                                                                         | 15.9106(2)                                                                          | 15.6820(6)                                                                          | 15.7092(11)                                                                         |
| $\alpha$ (°)                                             | 90                                                                                  | 90                                                                                  | 90                                                                                  | 90                                                                                  |
| $\beta$ (°)                                              | 90.618(3)                                                                           | 91.294(2)                                                                           | 90.237(3)                                                                           | 90.5320(10)                                                                         |
| $\gamma$ (°)                                             | 90                                                                                  | 90                                                                                  | 90                                                                                  | 90                                                                                  |
| <i>V</i> (Å <sup>3</sup> )                               | 3190.2(4)                                                                           | 3168.2(4)                                                                           | 3161.5(2)                                                                           | 3149.7(4)                                                                           |
| <i>Z</i>                                                 | 4                                                                                   | 4                                                                                   | 4                                                                                   | 4                                                                                   |
| <i>D<sub>c</sub></i> (g cm <sup>-3</sup> )               | 2.008                                                                               | 2.031                                                                               | 2.039                                                                               | 2.056                                                                               |
| $\mu$ (MoK $\alpha$ ) (mm <sup>-1</sup> ) <sup>d</sup>   | 5.647                                                                               | 5.977                                                                               | 6.141                                                                               | 9.852                                                                               |
| <i>T</i> (K)                                             | 100(2)                                                                              | 100(2)                                                                              | 100(2)                                                                              | 100(2)                                                                              |
| Observed reflections                                     | 5617 (4883)                                                                         | 5571 (4995)                                                                         | 6540 (5821)                                                                         | 6446 (6158)                                                                         |
| <i>R<sub>int</sub></i>                                   | 0.0426                                                                              | 0.0277                                                                              | 0.0328                                                                              | 0.0236                                                                              |
| Parameters                                               | 410                                                                                 | 410                                                                                 | 410                                                                                 | 410                                                                                 |
| GOF                                                      | 1.080                                                                               | 1.065                                                                               | 1.038                                                                               | 1.088                                                                               |
| <i>R<sub>1</sub></i> <sup>a,b</sup>                      | 0.0363 (0.0289)                                                                     | 0.0295 (0.0242)                                                                     | 0.0288 (0.0237)                                                                     | 0.0261 (0.0246)                                                                     |
| <i>wR<sub>2</sub></i> <sup>c</sup>                       | 0.0786 (0.0750)                                                                     | 0.0611 (0.0583)                                                                     | 0.0505 (0.0489)                                                                     | 0.0636 (0.0627)                                                                     |
| Largest difference in peak and hole (e Å <sup>-3</sup> ) | 2.851 and -0.398                                                                    | 1.834 and -0.563                                                                    | 0.921 and -0.811                                                                    | 0.848 and -1.138                                                                    |

<sup>a</sup>  $R_1 = \sum |F_o| - |F_c| / \sum |F_o|$ . <sup>b</sup> Values in parentheses for reflections with  $I > 2\sigma(I)$ . <sup>c</sup>  $wR_2 = \{\sum [w(F_o^2 - F_c^2)^2] / \sum [w(F_o^2)^2]\}^{1/2}$  <sup>d</sup>  $\mu$ (CuK $\alpha$ ) (mm<sup>-1</sup>) in **11**

**Table S4.-** Bond lengths (Å) and angles (°) for compounds **1**, **2** and **4-6**.

| <b>Compound</b>         | <b>1</b>   | <b>2</b>  | <b>4</b>   | <b>5</b>   | <b>6</b>   |
|-------------------------|------------|-----------|------------|------------|------------|
| Ln(1)···Zn(1)           | 3.437(1)   | 3.426(1)  | 3.406(1)   | 3.399(1)   | 3.383(1)   |
| Ln(1)-O(1A)             | 2.432(3)   | 2.421(2)  | 2.384(2)   | 2.364(4)   | 2.355(3)   |
| Ln(1)-O(2A)             | 2.471(3)   | 2.447(2)  | 2.401(2)   | 2.401(4)   | 2.384(3)   |
| Ln(1)-O(3A)             | 2.424(3)   | 2.407(2)  | 2.374(2)   | 2.367(4)   | 2.354(3)   |
| Ln(1)-O(4A)             | 2.454(3)   | 2.443(2)  | 2.400(3)   | 2.380(4)   | 2.373(4)   |
| Ln(1)-O(2P)bridge       | 2.393(3)   | 2.382(2)  | 2.337(2)   | 2.318(4)   | 2.312(4)   |
| Ln(1)-O(1C)nitrate      | 2.573(3)   | 2.551(2)  | 2.486(2)   | 2.509(4)   | 2.472(4)   |
| Ln(1)-O(2C)nitrate      | 2.545(3)   | 2.536(3)  | 2.532(2)   | 2.472(4)   | 2.492(4)   |
| Ln(1)-O(1D)nitrate      | 2.557(3)   | 2.553(2)  | 2.518(2)   | 2.480(4)   | 2.462(4)   |
| Ln(1)-O(2D)nitrate      | 2.572(3)   | 2.534(2)  | 2.494(3)   | 2.523(4)   | 2.518(4)   |
| Zn(1)-N(1A)             | 2.133(3)   | 2.132(3)  | 2.131(3)   | 2.127(4)   | 2.130(4)   |
| Zn(1)-N(2A)             | 2.099(3)   | 2.096(3)  | 2.105(3)   | 2.090(5)   | 2.103(4)   |
| Zn(1)-O(2A)             | 2.081(3)   | 2.083(2)  | 2.077(2)   | 2.069(4)   | 2.072(3)   |
| Zn(1)-O(3A)             | 2.149(3)   | 2.146(2)  | 2.130(2)   | 2.127(4)   | 2.127(3)   |
| Zn(1)-O(1P)bridge       | 1.953(3)   | 1.955(2)  | 1.967(2)   | 1.951(4)   | 1.952(4)   |
| Ln(1)-O(2A)-Zn(1)       | 97.70(10)  | 97.94(8)  | 98.77(9)   | 98.72(14)  | 98.55(13)  |
| Ln(1)-O(3A)-Zn(1)       | 97.26(11)  | 97.46(9)  | 98.12(9)   | 98.16(15)  | 97.92(13)  |
| O(2A)-Ln(1)-O(3A)       | 70.09(9)   | 70.26(7)  | 70.18(8)   | 69.90(12)  | 70.54(11)  |
| O(2A)-Ln(1)-O(2P)bridge | 78.55(10)  | 78.48(8)  | 78.76(9)   | 79.14(13)  | 79.38(12)  |
| O(3A)-Ln(1)-O(2P)bridge | 78.87(10)  | 78.90(8)  | 79.50(8)   | 79.90(13)  | 80.10(13)  |
| O(2A)-Zn(1)-O(3A)       | 83.26(11)  | 82.67(8)  | 81.45(9)   | 81.22(14)  | 81.30(13)  |
| O(2A)-Zn(1)-O(1P)bridge | 105.74(12) | 105.76(9) | 104.73(10) | 104.99(16) | 104.75(14) |
| O(3A)-Zn(1)-O(1P)bridge | 98.62(12)  | 98.46(9)  | 98.79(10)  | 98.58(15)  | 98.63(15)  |

**Table S5.-** Bond lengths (Å) and angles (°) for compounds **7** and **9-11**.

| <b>Compound</b>         | <b>7</b>   | <b>9</b>   | <b>10</b> | <b>11</b> |
|-------------------------|------------|------------|-----------|-----------|
| Ln(1)···Zn(1)           | 3.388(1)   | 3.371(1)   | 3.371(1)  | 3.360(1)  |
| Ln(1)-O(1A)             | 2.345(3)   | 2.330(3)   | 2.314(2)  | 2.303(2)  |
| Ln(1)-O(2A)             | 2.380(3)   | 2.361(2)   | 2.338(2)  | 2.336(2)  |
| Ln(1)-O(3A)             | 2.348(3)   | 2.325(3)   | 2.316(2)  | 2.307(2)  |
| Ln(1)-O(4A)             | 2.369(3)   | 2.343(3)   | 2.327(2)  | 2.320(2)  |
| Ln(1)-O(2P)bridge       | 2.285(3)   | 2.275(3)   | 2.261(2)  | 2.241(2)  |
| Ln(1)-O(1C)nitrate      | 2.484(3)   | 2.462(3)   | 2.463(2)  | 2.459(2)  |
| Ln(1)-O(2C)nitrate      | 2.450(4)   | 2.432(3)   | 2.417(2)  | 2.409(2)  |
| Ln(1)-O(1D)nitrate      | 2.511(3)   | 2.485(3)   | 2.411(2)  | 2.406(2)  |
| Ln(1)-O(2D)nitrate      | 2.449(3)   | 2.427(3)   | 2.513(2)  | 2.501(2)  |
| Zn(1)-N(1A)             | 2.131(4)   | 2.133(3)   | 2.128(2)  | 2.127(2)  |
| Zn(1)-N(2A)             | 2.106(4)   | 2.101(3)   | 2.108(3)  | 2.109(2)  |
| Zn(1)-O(2A)             | 2.076(3)   | 2.071(3)   | 2.078(2)  | 2.075(2)  |
| Zn(1)-O(3A)             | 2.118(3)   | 2.114(3)   | 2.114(2)  | 2.108(2)  |
| Zn(1)-O(1P)bridge       | 1.960(3)   | 1.960(3)   | 1.966(2)  | 1.961(2)  |
| Ln(1)-O(2A)-Zn(1)       | 98.78(12)  | 98.85(10)  | 99.33(7)  | 99.05(8)  |
| Ln(1)-O(3A)-Zn(1)       | 98.54(12)  | 98.71(10)  | 98.97(8)  | 98.98(8)  |
| O(2A)-Ln(1)-O(3A)       | 70.24(10)  | 70.31(9)   | 70.41(7)  | 80.78(7)  |
| O(2A)-Ln(1)-O(2P)bridge | 79.25(11)  | 79.71(9)   | 79.93(7)  | 80.21(7)  |
| O(3A)-Ln(1)-O(2P)bridge | 80.08(11)  | 80.47(9)   | 80.62(8)  | 80.78(7)  |
| O(2A)-Zn(1)-O(3A)       | 80.84(12)  | 80.29(10)  | 79.61(8)  | 79.81(8)  |
| O(2A)-Zn(1)-O(1P)bridge | 104.09(13) | 104.28(11) | 103.43(8) | 103.32(8) |
| O(3A)-Zn(1)-O(1P)bridge | 98.53(13)  | 98.62(11)  | 98.68(8)  | 98.25(8)  |

## 2. Experimental XRPD.

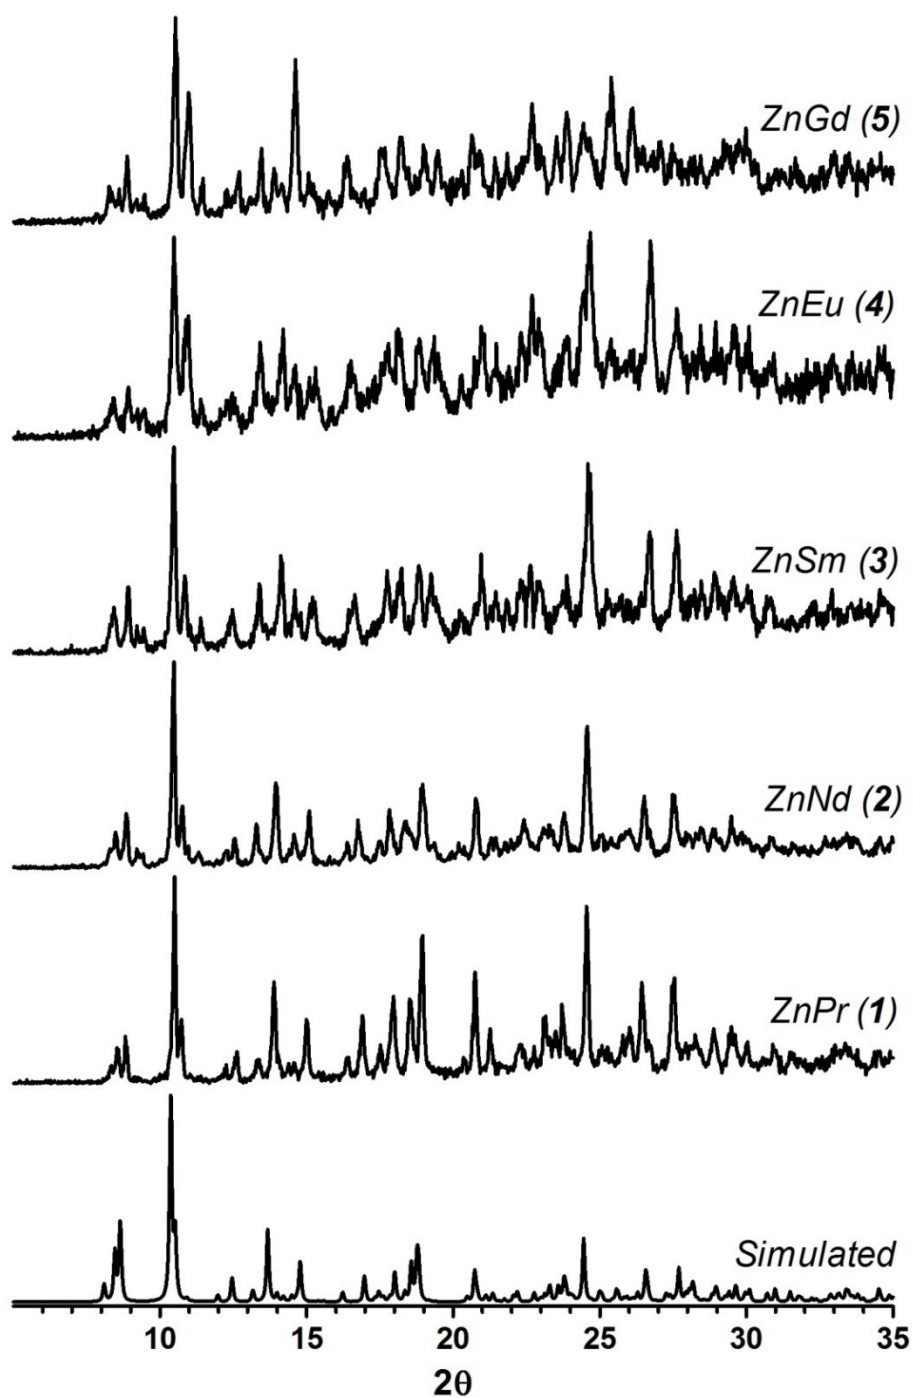

**Figure S1.-** Experimental XRPD for complexes 1-5 together with a simulated pattern of the Nd<sup>III</sup> complex 2 extracted from single-crystal X-ray diffractions.

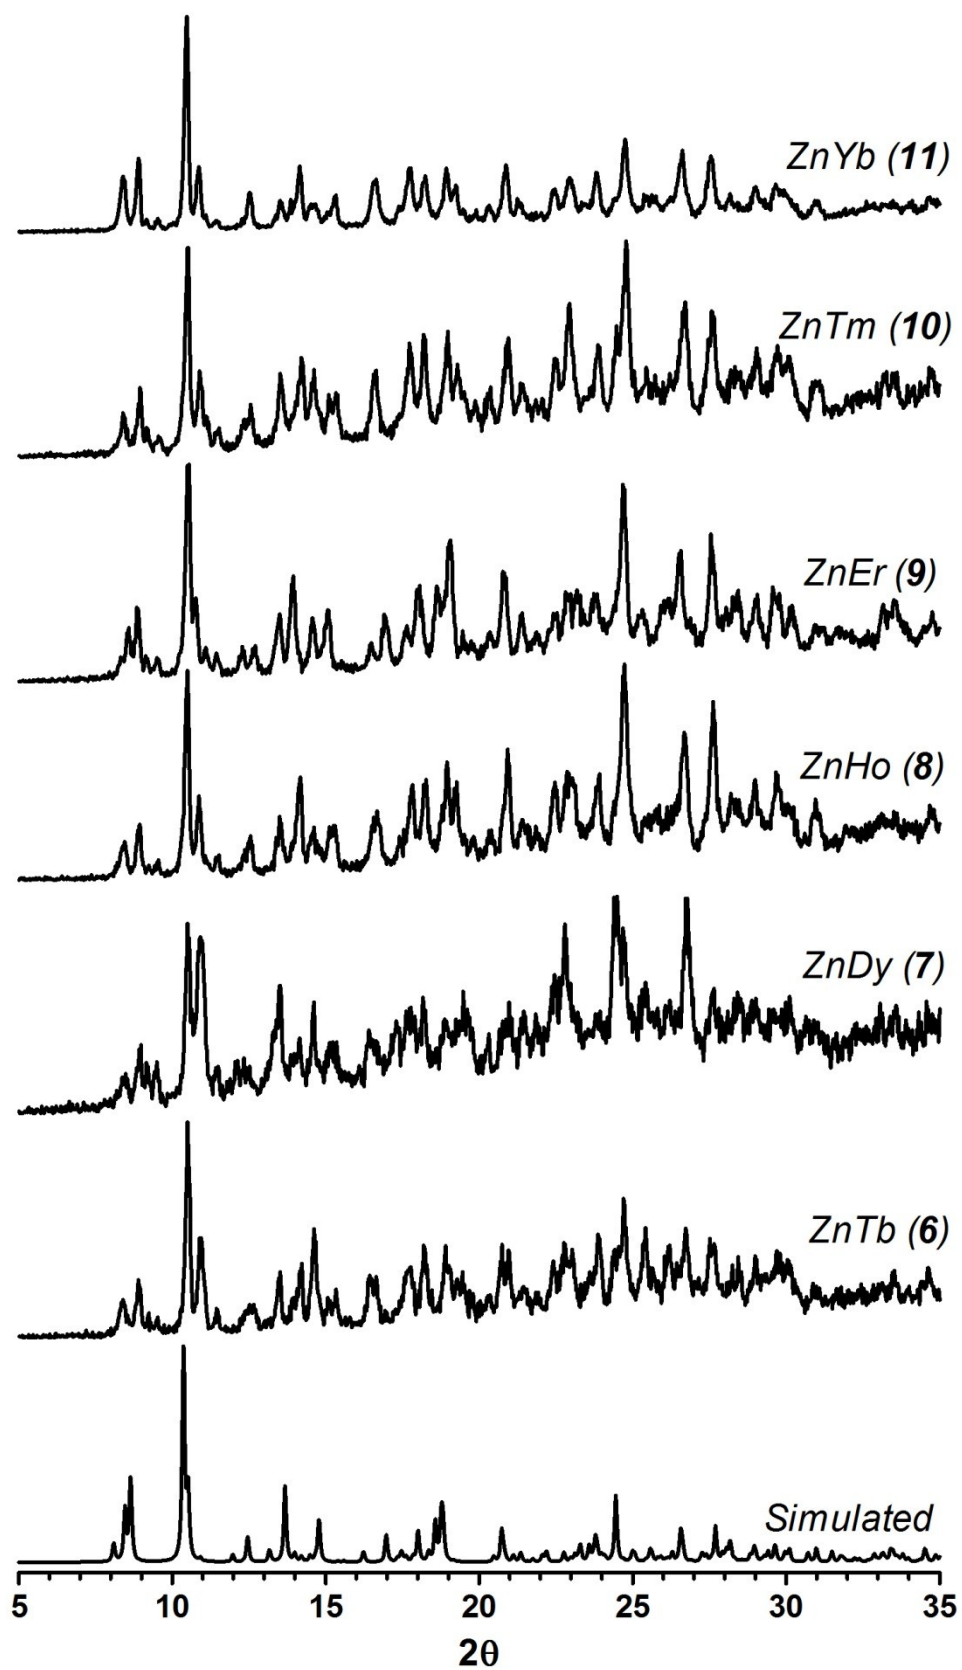

**Figure S2.-** Experimental XRPD for complexes 6-11 together with a simulated pattern of the  $\text{Nd}^{\text{III}}$  complex 2 extracted from single-crystal X-ray diffractions



### 3. Continuous Shape Measurements.

**Table S6.-** Continuous Shape Measurements for the ZnN<sub>2</sub>O<sub>3</sub> coordination environment. Low values indicate high proximity to the analyzed ideal geometry.

PP-5        1 D5h Pentagon  
vOC-5      2 C4v Vacant octahedron  
TBPY-5     3 D3h Trigonal bipyramid  
SPY-5      4 C4v Spherical square pyramid  
JTBPY-5    5 D3h Johnson trigonal bipyramid J12

|                | <b>PP-5</b> | <b>vOC-5</b> | <b>TBPY-5</b> | <b>SPY-5</b> | <b>JTBPY-5</b> |
|----------------|-------------|--------------|---------------|--------------|----------------|
| <b>Comp 1</b>  | 32.271      | 1.845        | 3.42          | 0.463        | 5.599          |
| <b>Comp 2</b>  | 32.26       | 1.928        | 3.395         | 0.481        | 5.617          |
| <b>Comp 4</b>  | 31.726      | 2.13         | 3.387         | 0.528        | 5.748          |
| <b>Comp 5</b>  | 31.847      | 2.056        | 3.44          | 0.522        | 5.71           |
| <b>Comp 6</b>  | 31.629      | 2.1          | 3.35          | 0.557        | 5.659          |
| <b>Comp 7</b>  | 31.524      | 2.212        | 3.333         | 0.597        | 5.722          |
| <b>Comp 9</b>  | 31.425      | 2.237        | 3.326         | 0.618        | 5.694          |
| <b>Comp 10</b> | 31.071      | 2.361        | 3.35          | 0.671        | 5.803          |
| <b>Comp 11</b> | 31.21       | 2.349        | 3.32          | 0.687        | 5.771          |

**Table S7.-** Continuous Shape Measurements for the LnO<sub>9</sub> coordination environment. Low values indicate high proximity to the analyzed ideal geometry.

|          |                    |                                    |
|----------|--------------------|------------------------------------|
| EP-9     | 1 D <sub>9h</sub>  | Enneagon                           |
| OPY-9    | 2 C <sub>8v</sub>  | Octagonal pyramid                  |
| HBPY-9   | 3 D <sub>7h</sub>  | Heptagonal bipyramid               |
| JTC-9    | 4 C <sub>3v</sub>  | Johnson triangular cupola J3       |
| JCCU-9   | 5 C <sub>4v</sub>  | Capped cube J8                     |
| CCU-9    | 6 C <sub>4v</sub>  | Spherical-relaxed capped cube      |
| JCSAPR-9 | 7 C <sub>4v</sub>  | Capped square antiprism J10        |
| CSAPR-9  | 8 C <sub>4v</sub>  | Spherical capped square antiprism  |
| JTCTPR-9 | 9 D <sub>3h</sub>  | Tricapped trigonal prism J51       |
| TCTPR-9  | 10 D <sub>3h</sub> | Spherical tricapped trigonal prism |
| JTDIC-9  | 11 C <sub>3v</sub> | Tridiminished icosahedron J63      |
| HH-9     | 12 C <sub>2v</sub> | Hula-hoop                          |
| MFF-9    | 13 C <sub>s</sub>  | Muffin                             |

|                | EP-9   | OPY-9  | HBPY-9 | JTC-9  | JCCU-9 | CCU-9 | JCSAPR-9 | CSAPR-9 | JTCTPR-9 | TCTPR-9 | JTDIC-9 | HH-9   | MFF-9 |
|----------------|--------|--------|--------|--------|--------|-------|----------|---------|----------|---------|---------|--------|-------|
| <b>Comp 1</b>  | 34.971 | 23.365 | 18.989 | 15.234 | 10.202 | 8.99  | 2.243    | 1.412   | 3.483    | 2.035   | 11.066  | 10.910 | 1.567 |
| <b>Comp 2</b>  | 34.999 | 23.173 | 19.08  | 15.231 | 10.15  | 9.07  | 2.197    | 1.365   | 3.440    | 1.971   | 11.131  | 11.081 | 1.538 |
| <b>Comp 4</b>  | 34.634 | 22.974 | 19.138 | 14.867 | 9.838  | 8.928 | 2.092    | 1.319   | 3.127    | 1.793   | 11.632  | 11.518 | 1.531 |
| <b>Comp 5</b>  | 34.833 | 23.164 | 19.211 | 15.148 | 9.878  | 9.017 | 1.942    | 1.206   | 3.169    | 1.856   | 11.552  | 11.511 | 1.454 |
| <b>Comp 6</b>  | 34.921 | 23.156 | 19.217 | 15.211 | 9.855  | 9.015 | 1.874    | 1.156   | 3.141    | 1.827   | 11.700  | 11.638 | 1.421 |
| <b>Comp 7</b>  | 34.693 | 23.12  | 19.316 | 14.99  | 9.804  | 8.974 | 1.893    | 1.18    | 3.041    | 1.772   | 11.908  | 11.768 | 1.452 |
| <b>Comp 9</b>  | 34.955 | 23.226 | 19.269 | 15.271 | 9.819  | 9.009 | 1.747    | 1.045   | 3.065    | 1.780   | 11.967  | 11.855 | 1.341 |
| <b>Comp 10</b> | 34.629 | 23.111 | 19.332 | 14.966 | 9.658  | 8.931 | 1.748    | 1.124   | 2.859    | 1.721   | 12.147  | 11.998 | 1.422 |
| <b>Comp 11</b> | 34.637 | 23.101 | 19.32  | 14.962 | 9.657  | 8.951 | 1.703    | 1.094   | 2.829    | 1.708   | 12.199  | 12.076 | 1.407 |

#### 4. Magnetic Measurements.

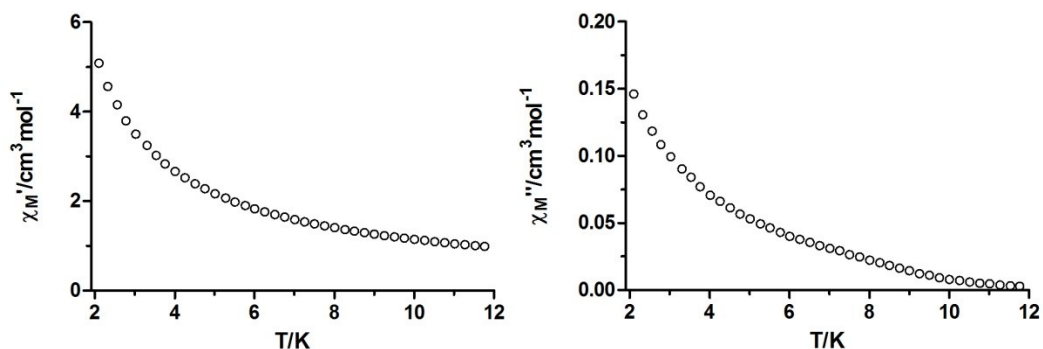

**Figure S3.-** Temperature dependence of in-phase  $\chi_M'$  (left) and out-of-phase  $\chi_M''$  (right) components of the *ac* susceptibility for complex **7** measured under zero applied *dc* field.

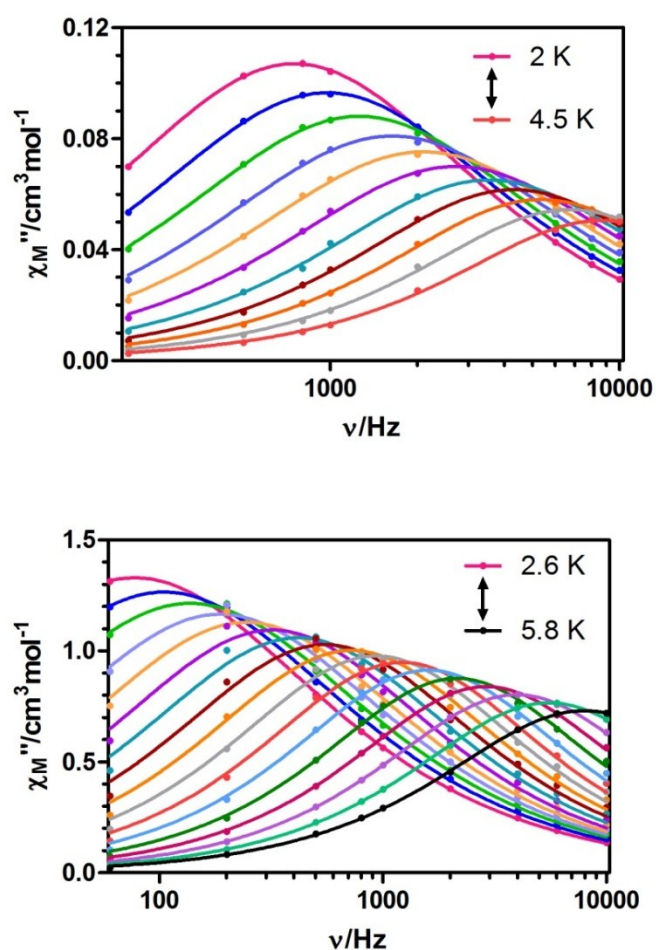

**Figure S4.-** Variable-temperature frequency dependence of the  $\chi_M''$  signal under 1000 Oe applied field for **2** (top) and **7** (bottom). Solid lines represent the best fitting of the experimental data to the Debye model.

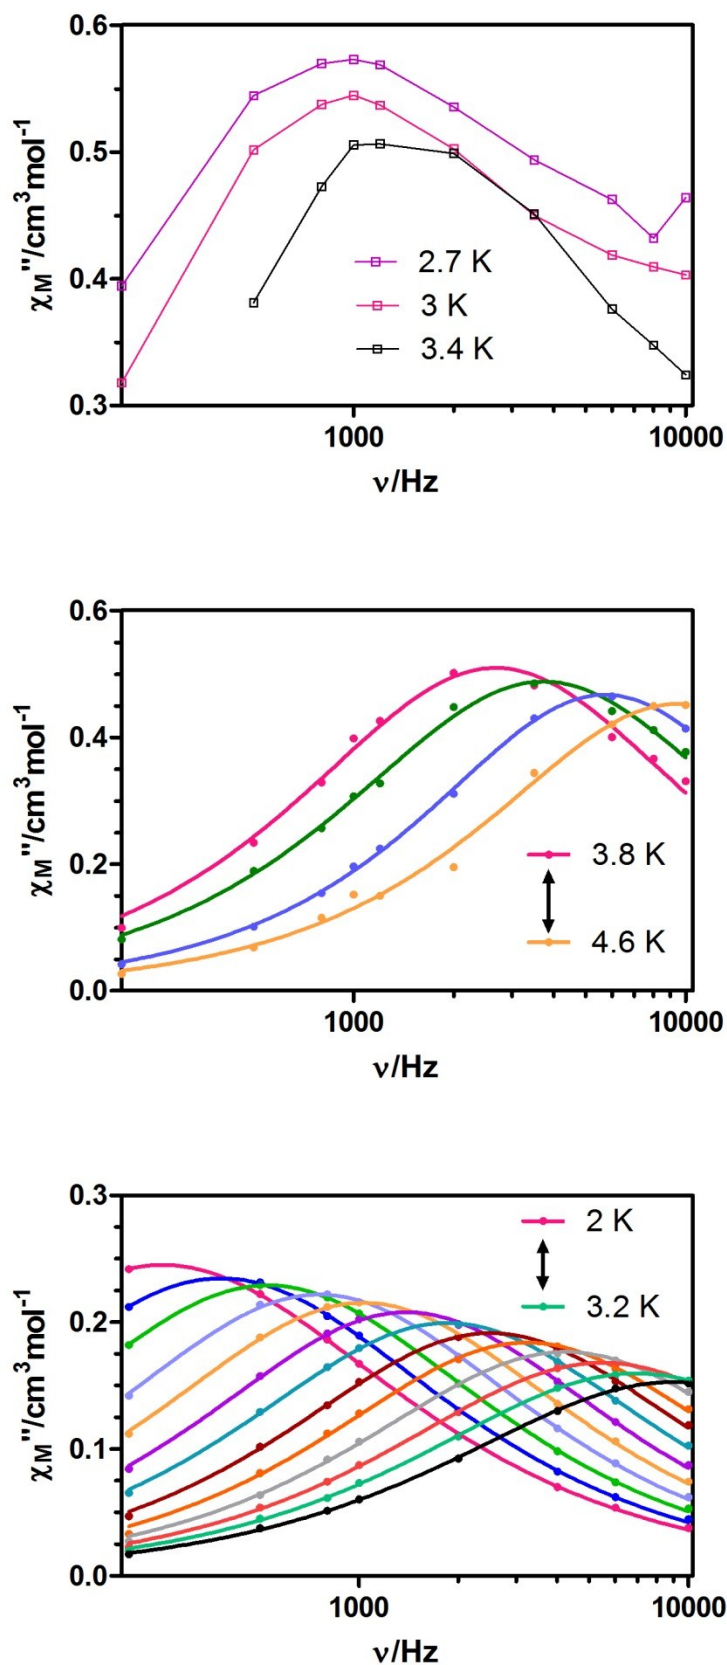

**Figure S5.-** Variable-temperature frequency dependence of the  $\chi_M''$  signal under 1000 Oe applied field for **9** (top and middle) and **11** (bottom). Solid lines are a guide to the eye in the upper plot, while in the two lower plots the lines represent the best fitting of the experimental data to the Debye model.

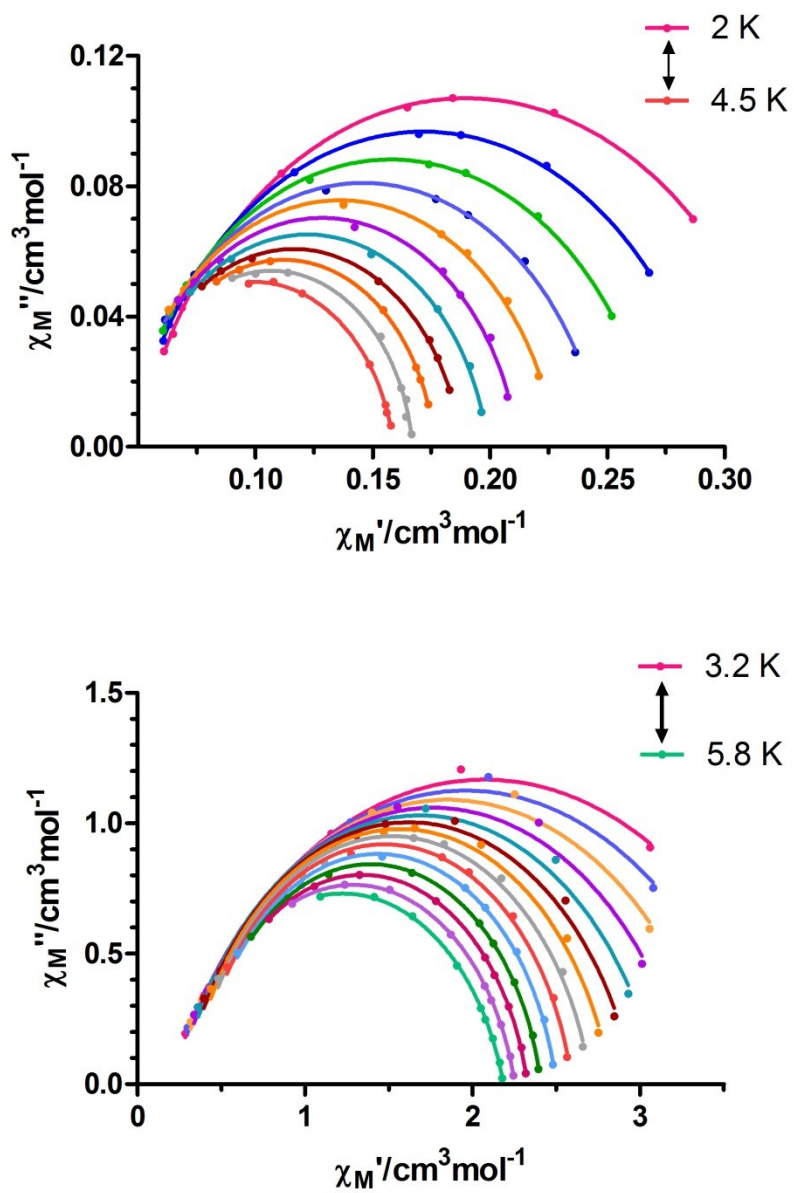

**Figure S6.-** Cole-Cole plot under 1000 Oe field for **2** (top) and **7** (bottom). Solid lines represent the best fits to the generalized Debye model.

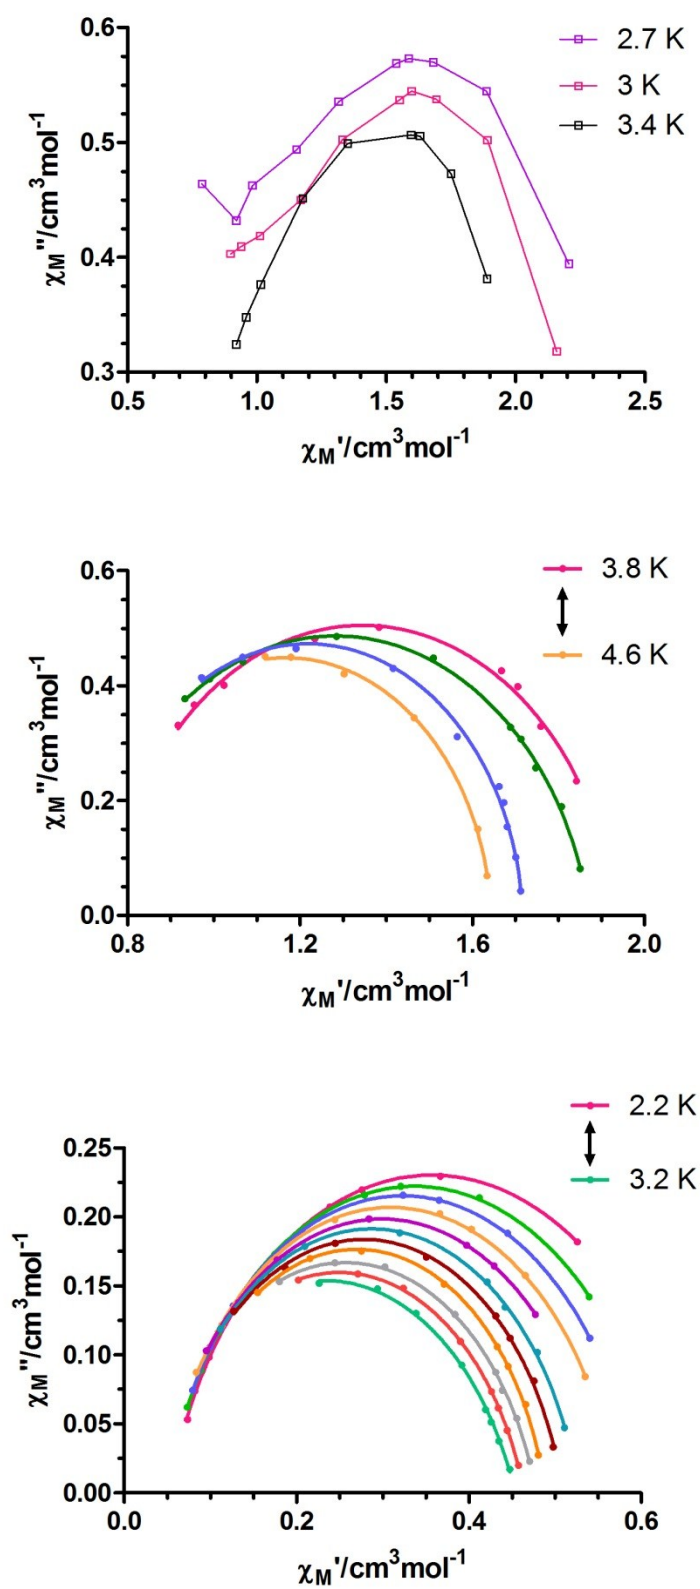

**Figure S7.-** Cole-Cole plot under 1000 Oe field for **9** (top and middle) and **11** (bottom). Solid lines are a guide to the eye in the upper plot, while in the two lower plots the lines represent the best fitting of the experimental data to the Debye model.

## 5. Reflectance Spectra.

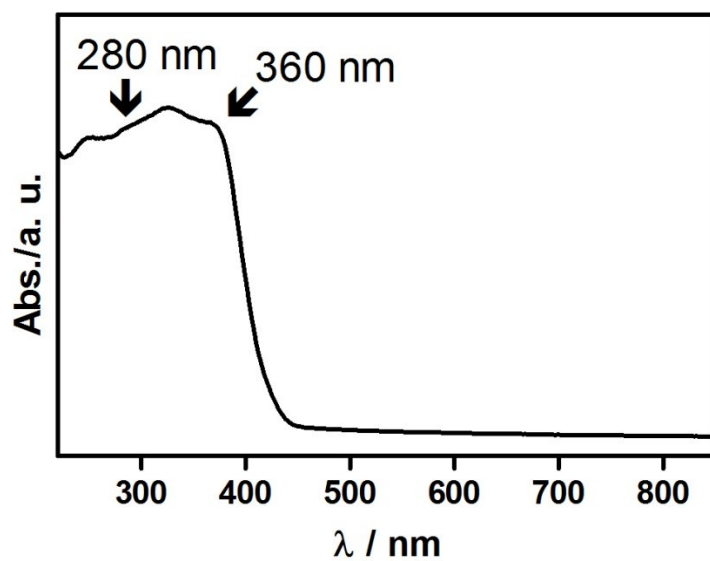

Figure S8.- Reflectance spectrum of the ligand.

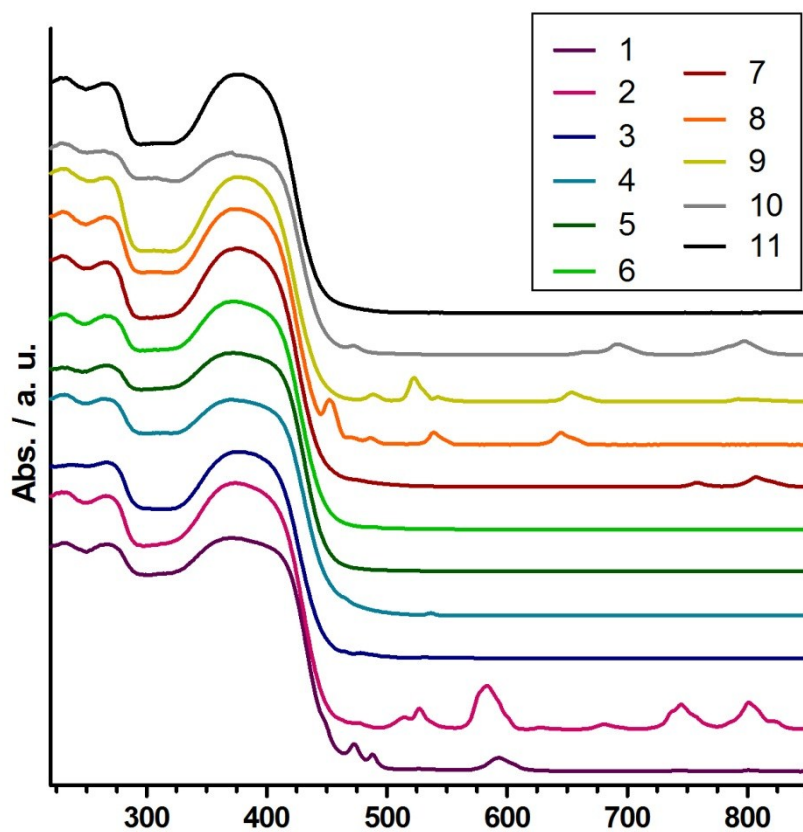

Figure S9.- Reflectance spectra of compounds 1-11.

## 6. Luminescence Properties.

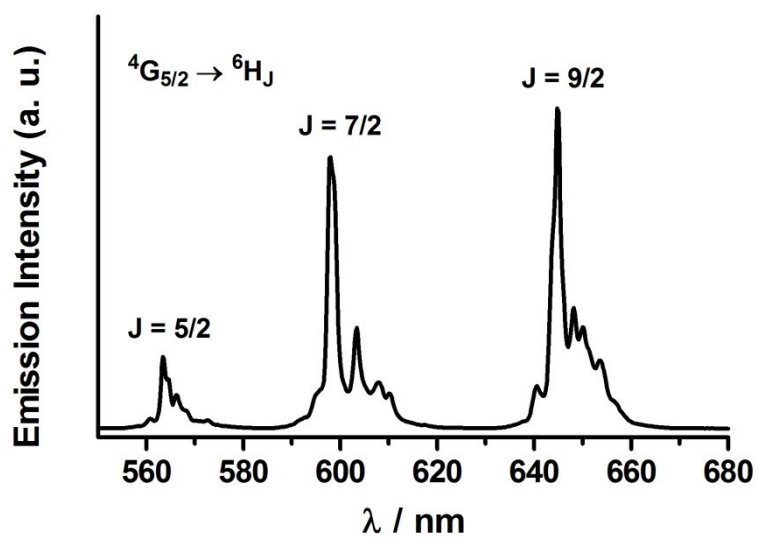

Figure S10.- Solid state photoluminescence spectra for Sm<sup>III</sup> compound 3 recorded at 10 K upon excitation at 375 nm.

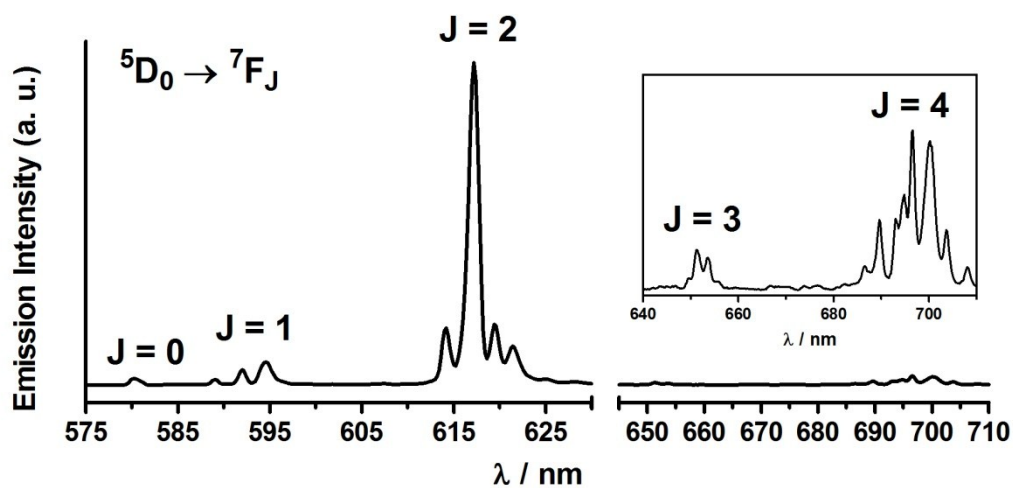

Figure S11.- Solid state photoluminescence spectra for Eu<sup>III</sup> compound 4 recorded at 10 K upon excitation at 375 nm. The inset shows a detailed view of the less intense transition bands.



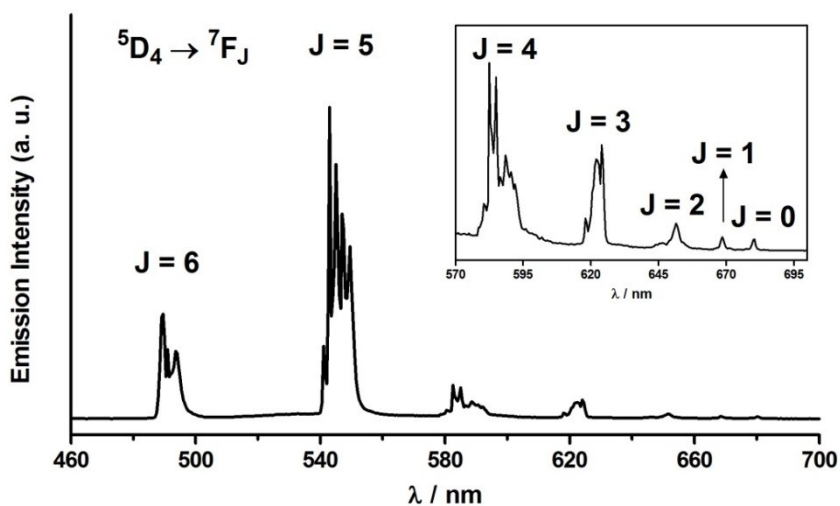

**Figure S12.-** Solid state photoluminescence spectra for Tb<sup>III</sup> compound **6** recorded at 10 K upon excitation at 375 nm. The inset shows a detailed view of the less intense transition bands.

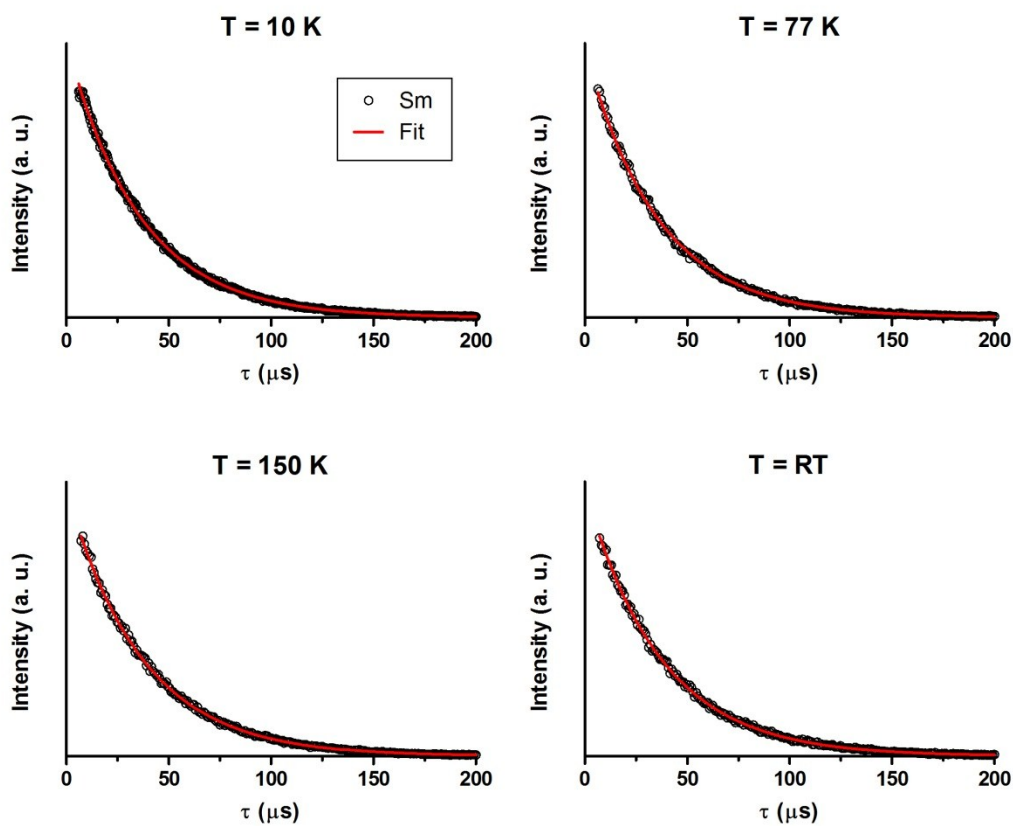

**Figure S13.-** Luminescence decay curves at different temperatures after excitation at 280 nm for Sm<sup>III</sup> compound **3** monitored at 645 nm.

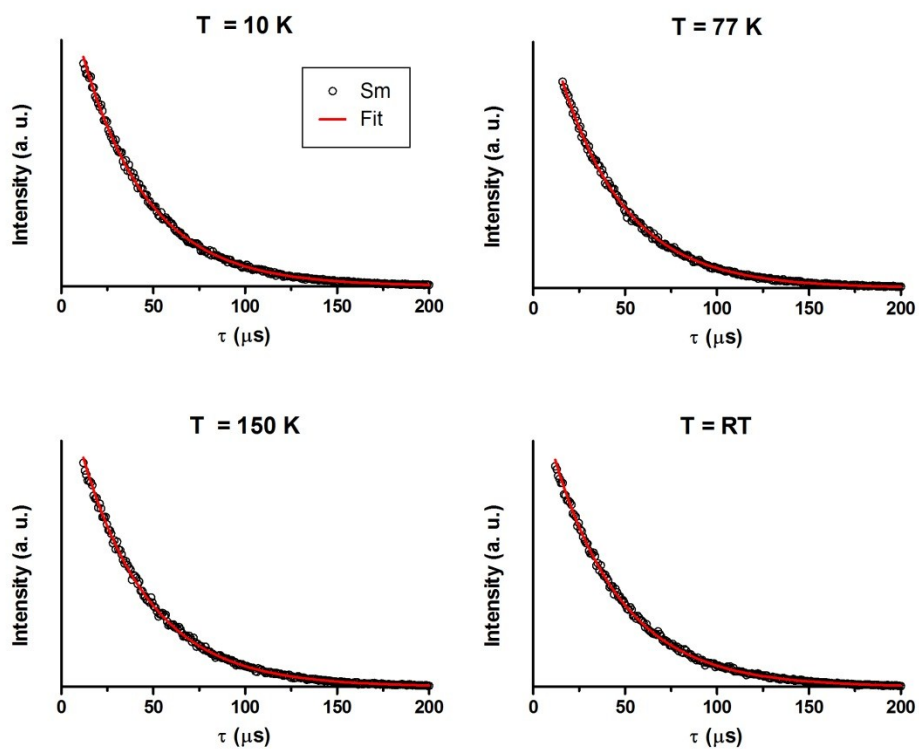

**Figure S14.-** Luminescence decay curves at different temperatures after excitation at 375 nm for Sm<sup>III</sup> compound **3** monitored at 645 nm.

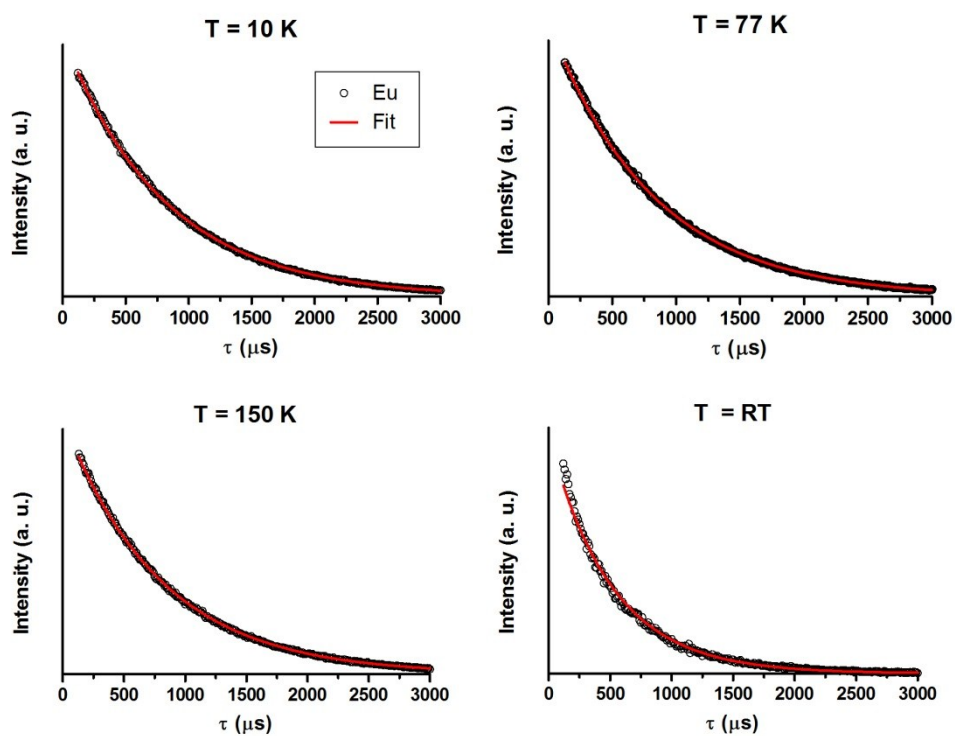

**Figure S15.-** Luminescence decay curves at different temperatures after excitation at 280 nm for Eu<sup>III</sup> compound **4** monitored at 617 nm.

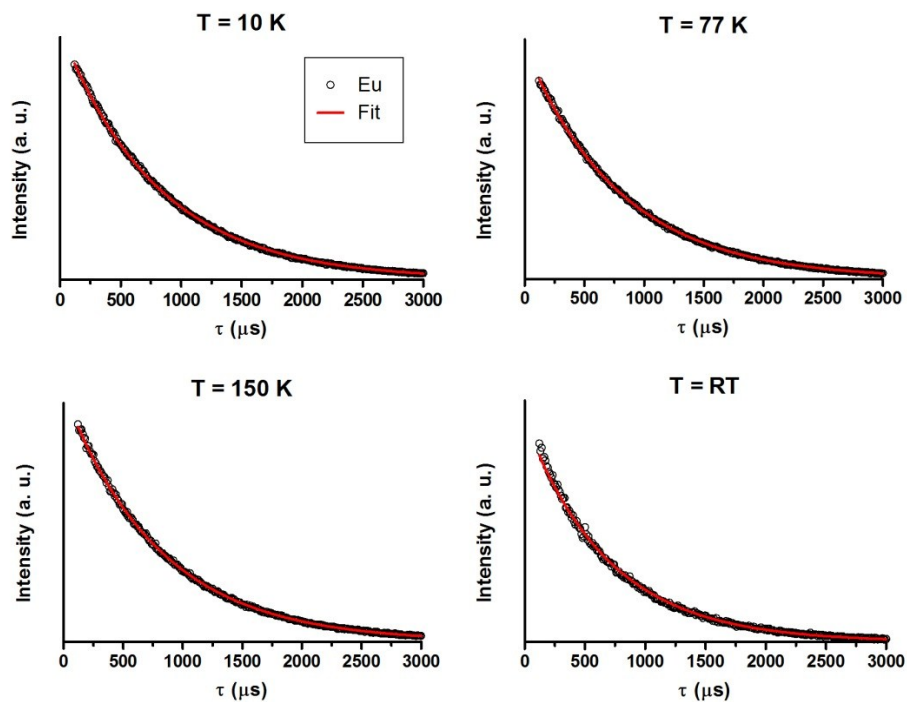

**Figure S16.-** Luminescence decay curves at different temperatures after excitation at 375 nm for Eu<sup>III</sup> compound **4** monitored at 617 nm.

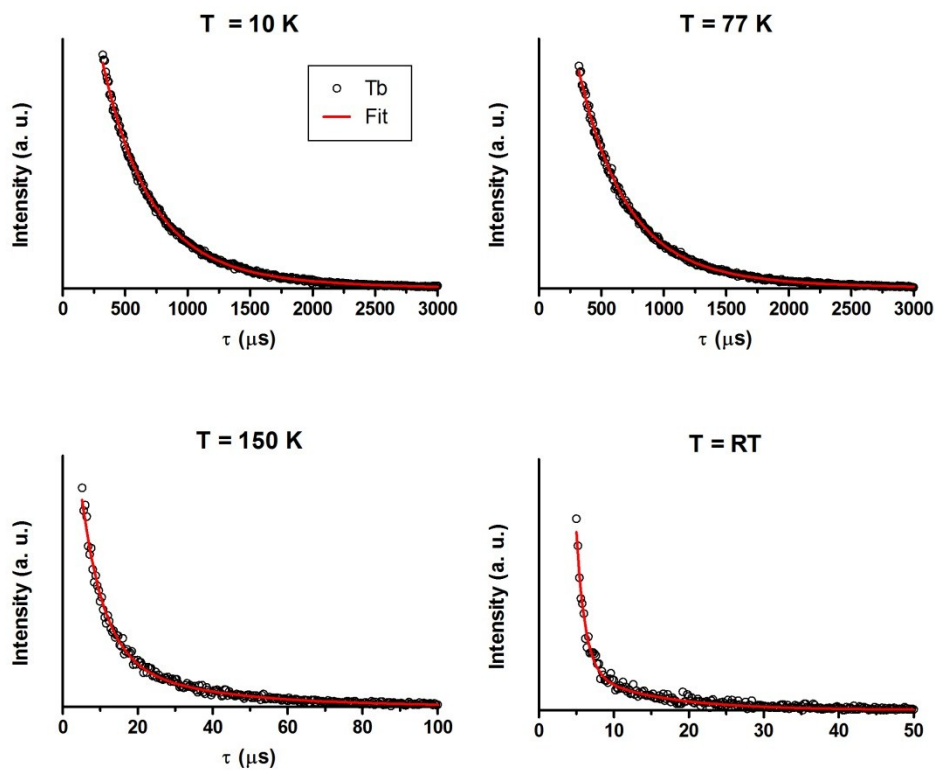

**Figure S17.-** Luminescence decay curves at different temperatures after excitation at 280 nm for Tb<sup>III</sup> compound **6** monitored at 545 nm.

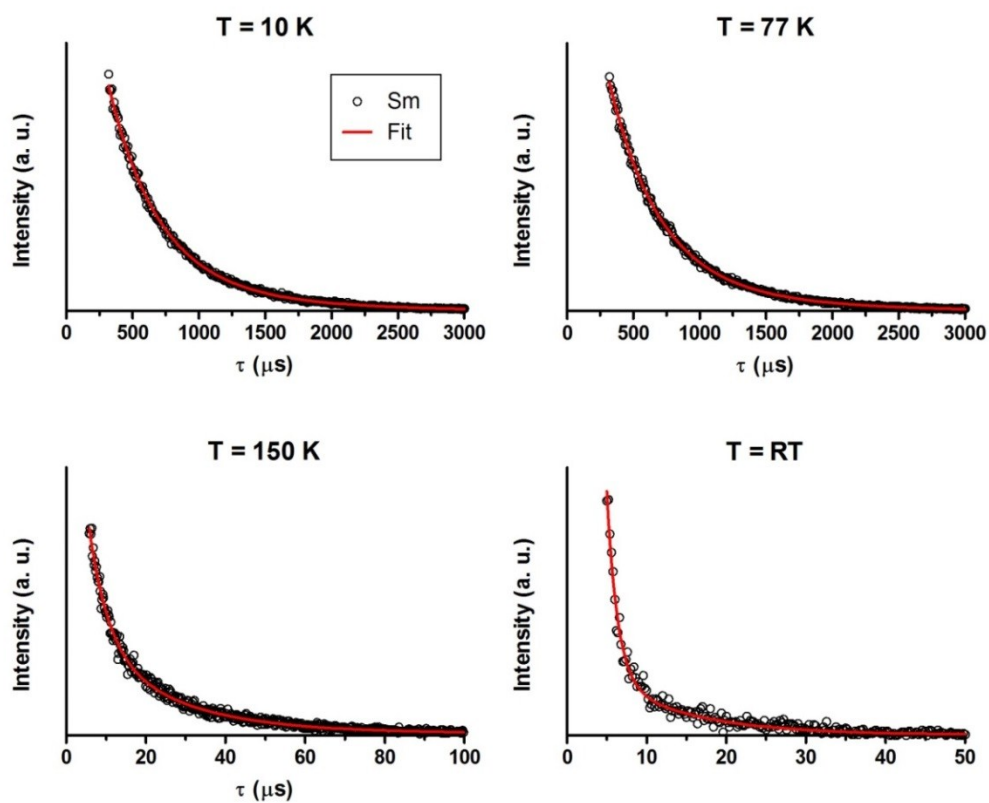

**Figure S18.-** Luminescence decay curves at different temperatures after excitation at 375 nm for Tb<sup>III</sup> compound **6** monitored at 545 nm.

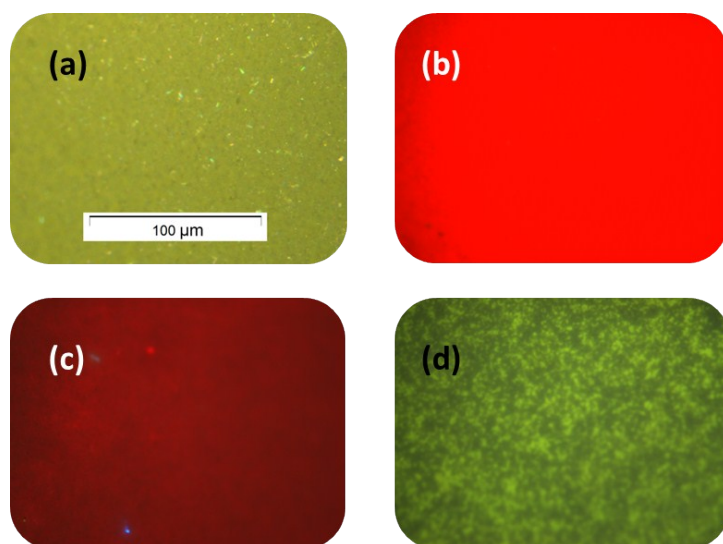

**Figure S19.-** Micro-photoluminescence images taken on powdered samples after irradiation with white light (reference) (a) and after excitation at 280 nm for Sm(III) (b), Eu(III) (c) and Tb(III) (d) derivatives at room temperature. All the images have been taken with the same scale.

**Table S8.-** Energy levels for complexes **6** and **11** calculated from luminescence and dc magnetic data.

| Energy level complex <b>6</b> (cm <sup>-1</sup> ) |         | Energy level complex <b>11</b> (cm <sup>-1</sup> ) |         |
|---------------------------------------------------|---------|----------------------------------------------------|---------|
| luminescence                                      | Dc data | luminescence                                       | Dc data |
| 0                                                 | 0       | 0                                                  | 0       |
| 20                                                | 12      | 11                                                 | 8       |
| 75                                                | 77      | 183                                                | 44      |
| 133                                               | 85      | 283                                                | 313     |
| 153                                               | 155     |                                                    |         |
| 190                                               | 215     |                                                    |         |
| 239                                               | 237     |                                                    |         |
